# Supplementary material for: Hydrogel behavior of a sugar-based gelator by introduction of an unsaturated moiety as a hydrophobic group
Source: Royal Society of Chemistry journal article supplement (doi:10.1039/b602279k), 2006-01-01
Supplement: b602279k.pdf [file b602279k.pdf]

## Electronic Supplementary Information

### Hydrogel behavior of a sugar-based gelator by introduction of an unsaturated moiety as a hydrophobic group

Jong Hwa Jung,<sup>a</sup> Jeong Ah Rim,<sup>b</sup> Won Seok Han,<sup>b</sup> Soo Jin Lee,<sup>a</sup> Young Joo Lee,<sup>b</sup>  
Eun Jin Cho,<sup>b</sup> Jong Seung Kim,<sup>c</sup> Qingmin Ji,<sup>d</sup> and Toshimi Shimizu<sup>d</sup>

<sup>a</sup> *Department of Chemistry, Research Institute of Natural Science, Gyeongsang National University, Chinju 660-701, S. Korea, E-mail: s\_jielee@gaechuk.gsnu.ac.kr Tel: +82-55-751-6021, Fax: +82-55-761-0244*

<sup>b</sup> *Korea Basic Science Institute (KBSI), Daejeon 305-333, Korea*

<sup>c</sup> *Department of Chemistry, Institute of Nanosensor & Biotechnology, Dankook University, Seoul 140-714, Korea*

<sup>d</sup> *Nanoarchitectonics Research Center (NARC), National Institute of Advanced Industrial Science and Technology (AIST), Tsukuba Central 5, 1-1-1 Higashi, Tsukuba, Ibaraki 305-8562, Japan*

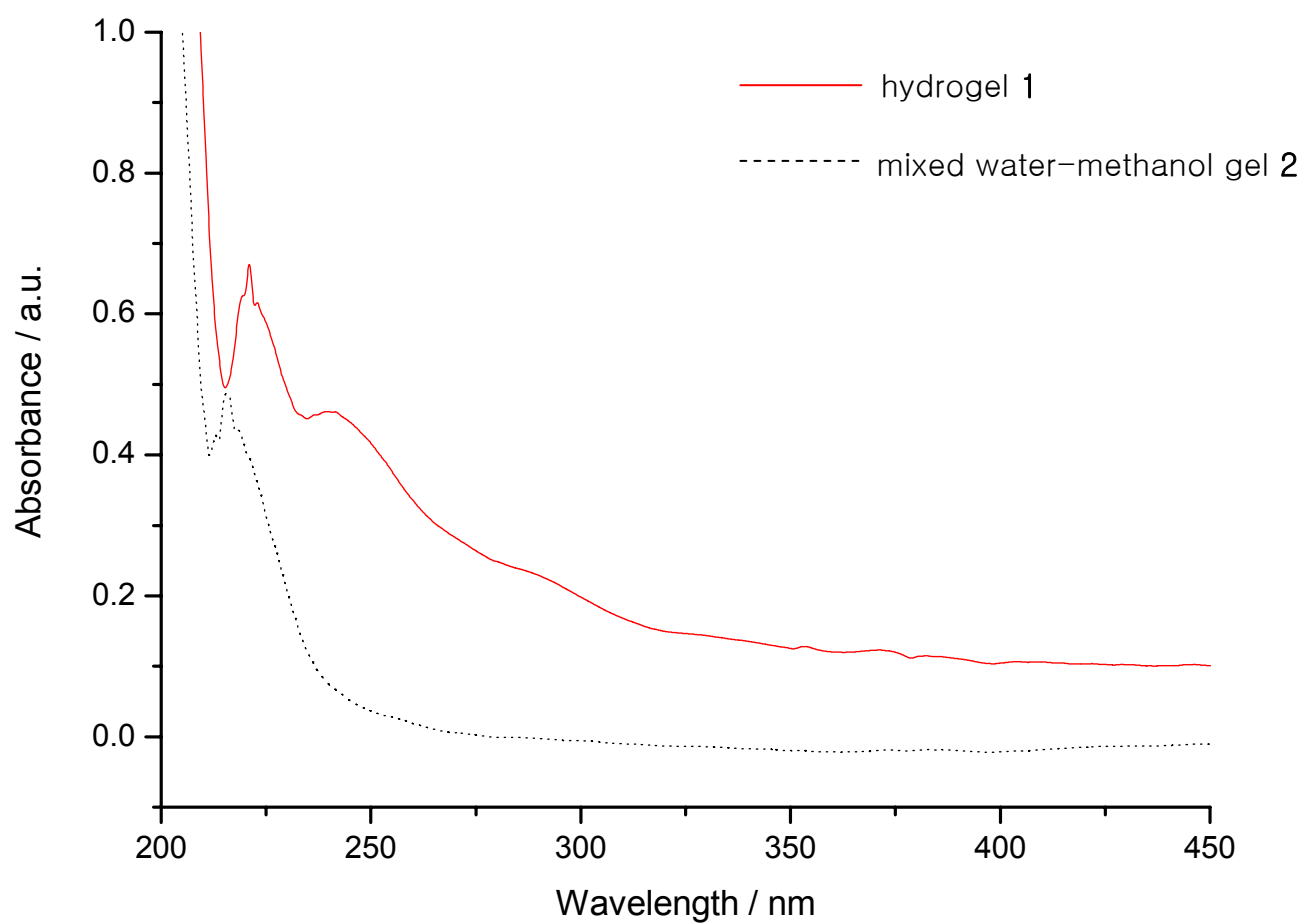

Fig. S1. UV-Vis Spectra of the hydrogel **1** and the mixed water-methanol gel **2**

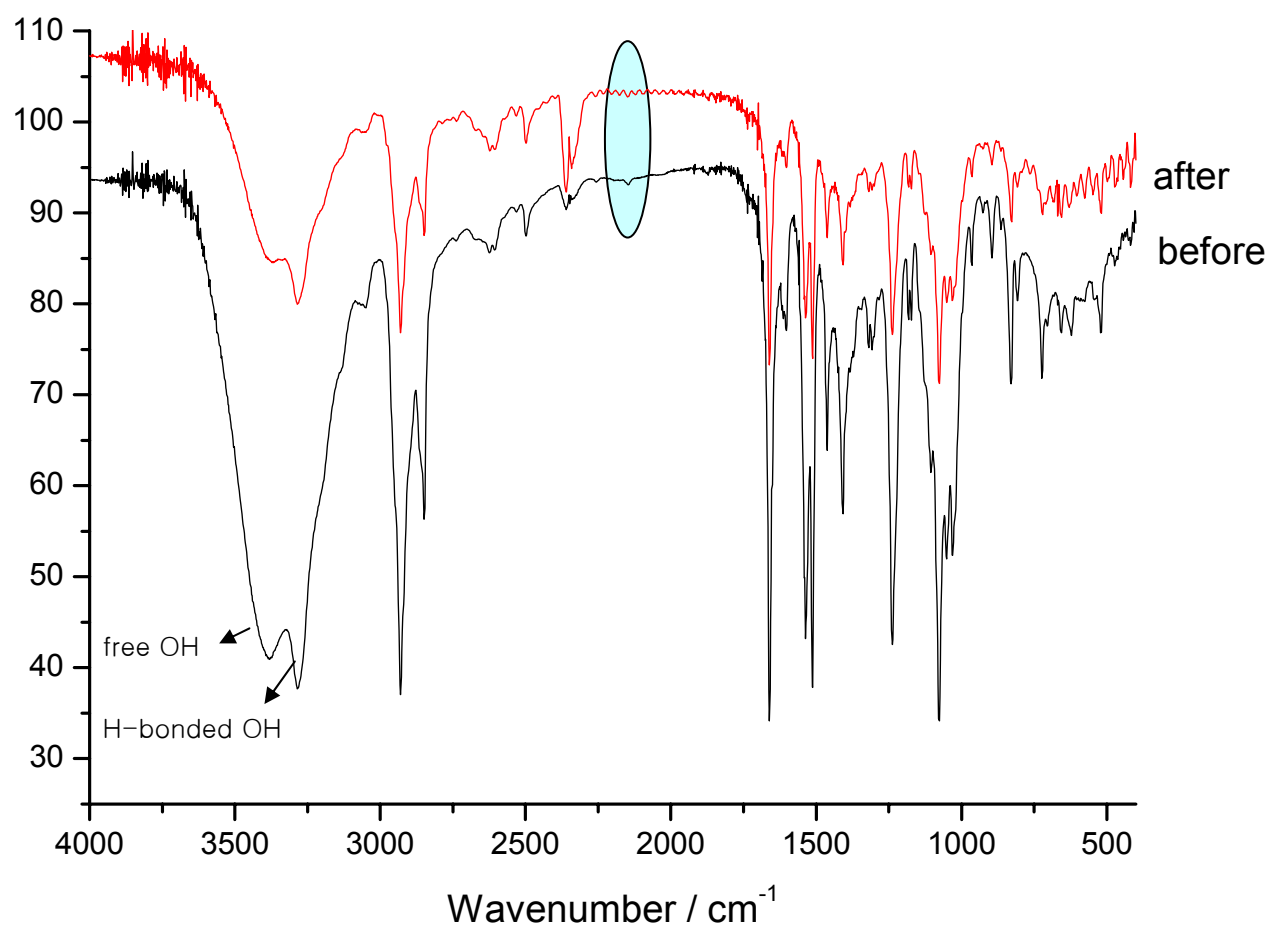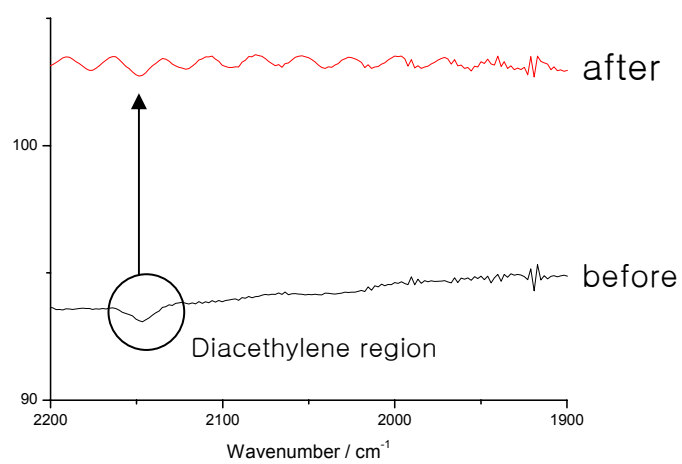

Fig. S2. IR Spectra of the hydrogel **1** before and after UV polymerization.
